# Supplementary material for: Inequality in the Utilization of Breast Cancer Screening between Women with and without Disabilities in Taiwan: A Propensity-Score-Matched Nationwide Cohort Study
Source: MDPI journal article supplement (doi:10.3390/ijerph19095280), 2022-04-26
Supplement: s1 [file s1]

**Supplementary Table S1.** Characteristics of women with disabilities before matching.

| Variables                        | N       | %      |
|----------------------------------|---------|--------|
| <b>Total</b>                     | 125,148 | 100.00 |
| <b>Disability type</b>           |         |        |
| Moving functional limitation     | 55,572  | 44.41  |
| Visual impairment                | 8,240   | 6.58   |
| Hearing impairment               | 12,000  | 9.59   |
| Speech disorder                  | 922     | 0.74   |
| Intellectual disability          | 4,399   | 3.52   |
| Multiple disabilities            | 9,619   | 7.69   |
| Dysfunction of primary organs    | 19,048  | 15.22  |
| Facial impairment                | 214     | 0.17   |
| Dementia                         | 1,657   | 1.32   |
| Congenital disorders             | 24      | 0.02   |
| Chronic mental health conditions | 12,920  | 10.32  |
| Balance disorder                 | 322     | 0.26   |
| Intractable epilepsy             | 151     | 0.12   |
| Rare diseases                    | 42      | 0.03   |
| Other <sup>a</sup>               | 18      | 0.01   |
| <b>Severity of disability</b>    |         |        |
| Mild                             | 45,436  | 36.31  |
| Moderate                         | 39,498  | 31.56  |
| Severe                           | 20,274  | 16.20  |
| Very severe                      | 19,940  | 15.93  |
| <b>Age</b>                       |         |        |
| 50-59 years                      | 69,570  | 55.59  |
| 60-69 years                      | 55,578  | 44.41  |
| <b>Monthly salary (NT\$)</b>     |         |        |
| Low-income households            | 4,475   | 3.58   |
| ≤17,280                          | 7,297   | 5.83   |
| 17,281-22,800                    | 54,715  | 43.72  |
| 22,801-28,800                    | 25,295  | 20.21  |
| 28,801-36,300                    | 16,742  | 13.38  |
| ≥36,301                          | 16,624  | 13.28  |
| <b>Urbanization level</b>        |         |        |
| 1                                | 25,550  | 20.42  |
| 2                                | 37,658  | 30.09  |
| 3                                | 18,781  | 15.01  |
| 4                                | 22,928  | 18.32  |
| 5                                | 4,330   | 3.46   |

|                                        |        |       |
|----------------------------------------|--------|-------|
| 6                                      | 8,465  | 6.76  |
| 7                                      | 7,436  | 5.94  |
| <b>CCI</b>                             |        |       |
| 0                                      | 53,251 | 42.55 |
| 1                                      | 26,739 | 21.37 |
| 2                                      | 19,252 | 15.38 |
| $\geq 3$                               | 25,906 | 20.70 |
| <b>Adults' preventive care service</b> |        |       |
| No                                     | 88,377 | 70.62 |
| Yes                                    | 36,771 | 29.38 |

---

<sup>a</sup> Including autism, chromosomal abnormalities, congenital metabolic abnormalitie.
